# Supplementary material for: Metabolite Profiling, Biological and Molecular Analyses Validate the Nutraceutical Potential of Green Seaweed Acrosiphonia orientalis for Human Health
Source: MDPI journal article supplement (doi:10.3390/nu16081222), 2024-04-19
Supplement: s1 [file s1]

**Table S4: Correlation matrix of different activities (total antioxidant, scavenging and reducing) and phenolic (TPC) and flavonoid (TFC) contents of *Acrosiphonia orientalis***

**Correlation matrix (Pearson):**

| Variables | TPC          | ABTS         | DPPH         | RP       | TFC          |
|-----------|--------------|--------------|--------------|----------|--------------|
| TPC       | <b>1</b>     | <b>0.916</b> | <b>0.975</b> | 0.670    | <b>0.949</b> |
| ABTS      | <b>0.916</b> | <b>1</b>     | <b>0.913</b> | 0.867    | <b>0.983</b> |
| DPPH      | <b>0.975</b> | <b>0.913</b> | <b>1</b>     | 0.630    | <b>0.969</b> |
| RP        | 0.670        | 0.867        | 0.630        | <b>1</b> | 0.775        |
| TFC       | <b>0.949</b> | <b>0.983</b> | <b>0.969</b> | 0.775    | <b>1</b>     |

*Values in bold are different from 0 with a significance level  $\alpha=0.05$*

**p-values (Pearson):**

| Variables | TPC          | ABTS         | DPPH         | RP       | TFC          |
|-----------|--------------|--------------|--------------|----------|--------------|
| TPC       | <b>0</b>     | <b>0.029</b> | <b>0.005</b> | 0.216    | <b>0.014</b> |
| ABTS      | <b>0.029</b> | <b>0</b>     | <b>0.031</b> | 0.057    | <b>0.003</b> |
| DPPH      | <b>0.005</b> | <b>0.031</b> | <b>0</b>     | 0.255    | <b>0.006</b> |
| RP        | 0.216        | 0.057        | 0.255        | <b>0</b> | 0.123        |
| TFC       | <b>0.014</b> | <b>0.003</b> | <b>0.006</b> | 0.123    | <b>0</b>     |

**Coefficients of determination (Pearson):**

| Variables | TPC      | ABTS     | DPPH     | RP       | TFC      |
|-----------|----------|----------|----------|----------|----------|
| TPC       | <b>1</b> | 0.839    | 0.951    | 0.449    | 0.901    |
| ABTS      | 0.839    | <b>1</b> | 0.833    | 0.752    | 0.966    |
| DPPH      | 0.951    | 0.833    | <b>1</b> | 0.397    | 0.939    |
| RP        | 0.449    | 0.752    | 0.397    | <b>1</b> | 0.601    |
| TFC       | 0.901    | 0.966    | 0.939    | 0.601    | <b>1</b> |

TPC: Total Phenolic Content; ABTS: Total antioxidant activity; DPPH: Radical Scavenging Activity; RP: Reducing Power, and TFC: Total Flavonoid Content
