# Supplementary material for: Metabolite Profiling, Biological and Molecular Analyses Validate the Nutraceutical Potential of Green Seaweed Acrosiphonia orientalis for Human Health
Source: MDPI journal article supplement (doi:10.3390/nu16081222), 2024-04-19
Supplement: s1 [file s1]

**Table S3:** Half maximal effective concentration (EC<sub>50</sub>) dose of *Acrosiphonia orientalis* for different bioactivities

| Bioactivities             | EC <sub>50</sub> dose^ |
|---------------------------|------------------------|
| Total antioxidant         | 40 ± 1                 |
| Radical scavenging        | 25 ± 7                 |
| Reducing capacity         | 5 ± 1                  |
| Anti-proliferative (HeLa) | 20 ± 2                 |
| Anti-proliferative (Huh7) | 25 ± 1                 |

^Dose (mean ± SE; n=3) in mg Dw (dry weight)

Values are round-up as per significant certainty numbers
