# Supplementary material for: Metabolite Profiling, Biological and Molecular Analyses Validate the Nutraceutical Potential of Green Seaweed Acrosiphonia orientalis for Human Health
Source: MDPI journal article supplement (doi:10.3390/nu16081222), 2024-04-19
Supplement: s1 [file s1]

**Table S1:** Primer sets and optimized PCR conditions for quantitative real-time PCR (Tanna et al., 2020, *Molecular Biology Reports*. 47, 7403–7411) [26].

| S. No. | Genes        | Primer pair (5' → 3')   |                        | qRT-PCR condition                                                                                                                                  |
|--------|--------------|-------------------------|------------------------|----------------------------------------------------------------------------------------------------------------------------------------------------|
|        |              | Forward                 | Revers                 |                                                                                                                                                    |
| 1.     | <i>GAPDH</i> | CAAGGTCATCCATGACAACTTTG | GTCCACCACCCTGTTGCTGTAG | Initial denaturation:<br>94 °C for 5 min<br><br>40 cycles:<br>94 °C- 30 s<br>58 °C- 45 s<br>72 °C- 60 s<br><br>Melt curve:<br>50 to 94 with 0.05°C |
| 2.     | <i>Cas3</i>  | ATGGAAGCGAATCAATGGAC    | GCCATGTCATCATCAACACC   |                                                                                                                                                    |
| 3.     | <i>p53</i>   | ATGGCCATCTACAAGCAG      | ACAGTCAAGAGCCAACCTCAG  |                                                                                                                                                    |
| 4.     | <i>DNMT</i>  | AGAACGCCTTTAAGCGCCG     | CCGTCCACTGCCACCAAAT    |                                                                                                                                                    |
| 5.     | <i>CDC2</i>  | ACAGGTCAAGTGGTAGCCATGA  | ACCTGGAATCCTGCATAAGCA  |                                                                                                                                                    |
| 6.     | <i>BAX</i>   | GTGGCAGCTGACATGTTTTTC   | GGAGGAAGTCCAATGTCCAG   |                                                                                                                                                    |
