# Supplementary material for: Metabolite Profiling, Biological and Molecular Analyses Validate the Nutraceutical Potential of Green Seaweed Acrosiphonia orientalis for Human Health
Source: Nutrients. 2024 Apr 19;16(8):1222. doi: 10.3390/nu16081222 (PMC11055090; doi:10.3390/nu16081222)
Supplement: Supplementary file 1 [file nutrients-16-01222-s001.zip]

Archive with 8 entries (8 files):
- Figures S1-S6.pptx
- Table S1.pdf
- Table S2.xlsx
- Table S3.pdf
- Table S4.pdf
- Table S5.xlsx
- Table S6.xlsx
- Table S7.xlsx
