# Supplementary material for: Metabolite Profiling, Biological and Molecular Analyses Validate the Nutraceutical Potential of Green Seaweed Acrosiphonia orientalis for Human Health
Source: Nutrients. 2024 Apr 19;16(8):1222. doi: 10.3390/nu16081222 (PMC11055090; doi:10.3390/nu16081222)
Supplement: Supplementary file 1 [file nutrients-16-01222-s001.zip › Table S2.xlsx]

## Sheet: Sheet1
Table S2: Key metabolites detected in LC-MS analysis (Metabolites detected in A. orientalis showing resemblance with existing metabolites from METLIN database)
METLIN ID	Mass	ΔPPM	Name of metabolites	Formula	Mode	ID	Category	Class	Description
58184	110.048	6	Imidazole-4-acetaldehyde	C5H6N2O	‒ve	HMDB0003905			Imidazole-4-acetaldehyde is a naturally occurring aldehyde metabolite of histamine formed by the action of histaminase (E.C. 1.4.3.6), and can be synthesized by oxidation of histidine. Aldehyde dehydrogenase (EC 1.2.1.3) is the only enzyme in the human liver capable of catalyzing dehydrogenation of aldehydes arising via monoamine, diamine, and plasma amine oxidases. NAD-linked dehydrogenation of …
86560	128.059	1	Squamolone	C5H8N2O2	‒ve	HMDB0029874			Squamolone is found in fruits. Squamolone is a constituent of Annona squamosa (sugar apple) and Asimina triloba (pawpaw). Squamolone belongs to the family of Ureides. These are compounds containing an ureide group with the general structure R-CO-NH-CO-N(R)R'', formally derived by the acylation of urea.
2461	220.096	6	2,4-Diamino-6,7-dimethoxyquinazoline	C10H12N4O2	‒ve	HMDB0060724			2,4-Diamino-6,7-dimethoxyquinazoline is a metabolite of prazosin. Prazosin, trade names Minipress, Vasoflex, Pressin and Hypovase, is a sympatholytic drug used to treat high blood pressure and anxiety, PTSD, and panic disorder. It is an alpha-adrenergic blocker. Specifically, prazosin is selective for the alpha-1 receptors on vascular smooth muscle. These receptors are responsible for the vasocon…
89427	308.074	0	D-Erythroascorbic acid 1'-a-D-glucoside	C11H16O10	‒ve	HMDB0033627			D-Erythroascorbic acid 1'-a-D-glucoside is found in mushrooms. D-Erythroascorbic acid 1'-a-D-glucoside is produced by Hypsizygus mamoreus (bunashimeji) and Pleurotus ostreatus (oyster mushroom).
47760	462.116	9	Dalpanitin	C22H22O11	‒ve	LMPK12050253	Polyketides [PK]	Flavonoids [PK12]	Isoflavonoids [PK1205]
47355	318.11	21	Epicatechin 5,3'-dimethyl ether	C17H18O6	‒ve	LMPK12020139	Polyketides [PK]	Flavonoids [PK12]	Flavans, Flavanols and Leucoanthocyanidins [PK1202]
47359	318.11	21	Catechin 7,4'-dimethyl ether	C17H18O6	‒ve	LMPK12020143	Polyketides [PK]	Flavonoids [PK12]	Flavans, Flavanols and Leucoanthocyanidins [PK1202]
48283	318.11	21	Bryaflavan	C17H18O6	‒ve	LMPK12080038	Polyketides [PK]	Flavonoids [PK12]	Isoflavans [PK1208]
52035	336.136	24	Pongachalcone I	C21H20O4	‒ve	LMPK12120231	Polyketides [PK]	Flavonoids [PK12]
52042	336.136	24	Cedreprenone	C21H20O4	‒ve	LMPK12120238	Polyketides [PK]	Flavonoids [PK12]	Chalcones are a group of plant-derived polyphenolic compounds belonging to the flavonoids family
47239	258.089	21	Epidistenin	C15H14O4	‒ve	LMPK12020023	Polyketides [PK]	Flavonoids [PK12]	Flavans, Flavanols and Leucoanthocyanidins [PK1202]
47478	258.089	21	Apigeniflavan	C15H14O4	‒ve	LMPK12020262	Polyketides [PK]	Flavonoids [PK12]	Flavans, Flavanols and Leucoanthocyanidins [PK1202]
86320	342.183	17	7-(4-Hydroxy-3-methoxyphenyl)-5-methoxy-1-phenyl-3-heptanone	C21H26O4	‒ve	HMDB0029525			7-(4-Hydroxy-3-methoxyphenyl)-5-methoxy-1-phenyl-3-heptanone is found in herbs and spices. 7-(4-Hydroxy-3-methoxyphenyl)-5-methoxy-1-phenyl-3-heptanone is from Alpinia officinarum (lesser galangal) 7-(4-Hydroxy-3-methoxyphenyl)-5-methoxy-1-phenyl-3-heptanone belongs to the family of Methoxyphenols and Derivatives. These are compounds containing a methoxy group attached to the benzene ring of a ph…
2065	360.194	15	prednisolone	C21H28O5	‒ve	LMST02030179	Sterol Lipids [ST]	Steroids [ST02]	C21 steroids (gluco/mineralocorticoids, progestogins) and derivatives [ST0203]
53268	282.162	17	4-Prenyldihydropinosylvin	C19H22O2	‒ve	LMPK13090041	Polyketides [PK]	Aromatic polyketides [PK13]	Diphenyl ethers, biphenyls, dibenzyls and stilbenes [PK1309]
91896	378.168	1	Gibberellin A66	C20H26O7	‒ve	HMDB0036900			Gibberellin A66 is found in fats and oils. Gibberellin A66 is isolated from seeds of Helianthus annuus (sunflower).
91668	396.178	0	Pteroside P	C20H28O8	‒ve	HMDB0036608			Pteroside P is found in green vegetables. Pteroside P is a constituent of Pteridium aquilinum (bracken fern).
36391	380.175	21	chlorovulone I	C21H29ClO4	‒ve	LMFA03120008	Fatty Acyls [FA]	Eicosanoids [FA03]	Clavulones [FA0312]
48207	398.173	14	Sphenostylin A	C23H26O6	‒ve	LMPK12070119	Polyketides [PK]	Flavonoids [PK12]	Pterocarpans [PK1207]
42027	540.267	0	6,19-epidioxy-26,26,26,27,27,27-hexafluoro-25-hydroxy-6,19-dihydrovitamin D3 / 6,19-epidioxy-26,26,26,27,27,27-hexafluoro-25-hydroxy-6,19-dihydrocholecalciferol	C27H38F6O4	‒ve	LMST03020087	Sterol Lipids [ST]	Secosteroids [ST03]	Vitamin D3 and derivatives [ST0302]
93599	1080.54	0	Cistocardin	C51H84O24	‒ve	HMDB0038992			Cistocardin is found in onion-family vegetables. Cistocardin is a constituent of Allium chinense (rakkyo).
50128	632.211	12	Ikarisoside F	C31H36O14	‒ve	LMPK12111712	Polyketides [PK]	Flavonoids [PK12]	Flavones and Flavonols [PK1211]
95811	554.2	22	Marmesin rutinoside	C26H34O13	‒ve	HMDB0041413			Marmesin rutinoside is found in herbs and spices. Marmesin rutinoside is a constituent of the roots of Murraya koenigii (curry leaf tree).
93487	732.133	8	Oolongtheanin	C36H28O17	‒ve	HMDB0038858			Oolongtheanin is found in tea. Oolongtheanin is isolated from Camellia sinensis var. viridis (oolong tea).
50618	654.107	0	Quercetin 3,7-diglucuronide	C27H26O19	‒ve	LMPK12112202	Polyketides [PK]	Flavonoids [PK12]	Flavones and Flavonols [PK1211]
50435	718.247	21	Sagittatoside C	C35H42O16	+ve		LMPK12112019	Polyketides [PK]	Flavones and Flavonols [PK1211]		http://www.lipidmaps.org/data/LMSDRecord.php?LMID=LMPK12112019
50436	718.247	21	Epimedokoreanoside II	C35H42O16	+ve		LMPK12112020	Polyketides [PK]	Flavones and Flavonols [PK1211]		http://www.lipidmaps.org/data/LMSDRecord.php?LMID=LMPK12112020
53026	686.252	20	Calyxin J	C42H38O9	+ve		LMPK12140544	Polyketides [PK]	Flavones and Flavonols [PK1211]		http://www.lipidmaps.org/data/LMSDRecord.php?LMID=LMPK12140544
53029	686.252	20	Epicalyxin J	C42H38O9	+ve		LMPK12140550	Polyketides [PK]	Flavones and Flavonols [PK1211]		http://www.lipidmaps.org/data/LMSDRecord.php?LMID=LMPK12140550
Notable metabolites or their derivatives identified s by homology search from METLIN database using liquid chromatography-mass spectrometry (LC-MS) peaks.
