# Supplementary material for: Metabolite Profiling, Biological and Molecular Analyses Validate the Nutraceutical Potential of Green Seaweed Acrosiphonia orientalis for Human Health
Source: Nutrients. 2024 Apr 19;16(8):1222. doi: 10.3390/nu16081222 (PMC11055090; doi:10.3390/nu16081222)
Supplement: Supplementary file 1 [file nutrients-16-01222-s001.zip › Table S5.xlsx]

## Sheet: Pathway results_GCMS
Table S5: Pathway analysis results of log transformed and range scaled metabolite abundance by GC-MS in A. orientalis
	Total	Expected	Hits	Raw p	Holm adjust	FDR	Impact
Aminoacyl-tRNA biosynthesis	46	1.2407	12	5.2386e-10	5.029e-08	5.029e-08	0
Glyoxylate and dicarboxylate metabolism	29	0.7822	6	7.8766e-05	0.0074828	0.0037808	0.20653
Alanine, aspartate and glutamate metabolism	22	0.59339	5	0.00020798	0.01955	0.0066553	0.64388
Cyanoamino acid metabolism	29	0.7822	4	0.0066264	0.61625	0.15903	0
Glycine, serine and threonine metabolism	33	0.89009	4	0.01056	0.97155	0.17928	0.3547
Arginine biosynthesis	18	0.4855	3	0.011205	1	0.17928	0.08544
Valine, leucine and isoleucine biosynthesis	22	0.59339	3	0.019625	1	0.26914	0
Lysine biosynthesis	9	0.24275	2	0.02266	1	0.27192	0
Glutathione metabolism	26	0.70128	3	0.030757	1	0.32606	0.13362
Galactose metabolism	27	0.72825	3	0.033965	1	0.32606	0.04252
Nitrogen metabolism	12	0.32367	2	0.039476	1	0.34451	0
Butanoate metabolism	17	0.45853	2	0.074756	1	0.59805	0
Lysine degradation	18	0.4855	2	0.0827	1	0.61071	0
Citrate cycle (TCA cycle)	20	0.53945	2	0.099317	1	0.62286	0.15581
Glycerolipid metabolism	21	0.56642	2	0.10795	1	0.62286	0.01703
Biosynthesis of unsaturated fatty acids	22	0.59339	2	0.11679	1	0.62286	0
Phenylalanine, tyrosine and tryptophan biosynthesis	22	0.59339	2	0.11679	1	0.62286	0.02152
Starch and sucrose metabolism	22	0.59339	2	0.11679	1	0.62286	0.09857
Isoquinoline alkaloid biosynthesis	6	0.16183	1	0.15154	1	0.7657	0.5
Fatty acid biosynthesis	56	1.5105	3	0.18948	1	0.85917	0.01123
Monobactam biosynthesis	8	0.21578	1	0.19689	1	0.85917	0
Tropane, piperidine and pyridine alkaloid biosynthesis	8	0.21578	1	0.19689	1	0.85917	0
Arginine and proline metabolism	34	0.91706	2	0.23283	1	0.97181	0.14404
Glucosinolate biosynthesis	65	1.7532	3	0.25424	1	0.97221	0
Phenylalanine metabolism	11	0.2967	1	0.26052	1	0.97221	0.47059
Valine, leucine and isoleucine degradation	37	0.99798	2	0.26331	1	0.97221	0
Nicotinate and nicotinamide metabolism	13	0.35064	1	0.30017	1	1	0
Sulfur metabolism	15	0.40459	1	0.33775	1	1	0.03315
Tyrosine metabolism	16	0.43156	1	0.3558	1	1	0.10811
Ascorbate and aldarate metabolism	18	0.4855	1	0.39046	1	1	0
Cutin, suberine and wax biosynthesis	18	0.4855	1	0.39046	1	1	0
beta-Alanine metabolism	18	0.4855	1	0.39046	1	1	0
Propanoate metabolism	20	0.53945	1	0.4233	1	1	0
Carbon fixation in photosynthetic organisms	21	0.56642	1	0.43907	1	1	0
Thiamine metabolism	22	0.59339	1	0.45442	1	1	0
Fatty acid elongation	23	0.62036	1	0.46936	1	1	0
Pantothenate and CoA biosynthesis	23	0.62036	1	0.46936	1	1	0
Glycolysis / Gluconeogenesis	26	0.70128	1	0.51181	1	1	0.00038
Phosphatidylinositol signaling system	26	0.70128	1	0.51181	1	1	0.03285
Inositol phosphate metabolism	28	0.75523	1	0.53826	1	1	0.10251
Fatty acid degradation	37	0.99798	1	0.64097	1	1	0
Ubiquinone and other terpenoid-quinone biosynthesis	38	1.0249	1	0.6509	1	1	0
Pyrimidine metabolism	38	1.0249	1	0.6509	1	1	0
Cysteine and methionine metabolism	46	1.2407	1	0.72127	1	1	0
Phenylpropanoid biosynthesis	46	1.2407	1	0.72127	1	1	0
Porphyrin and chlorophyll metabolism	48	1.2947	1	0.73658	1	1	0
Purine metabolism	63	1.6993	1	0.82799	1	1	0
