# Supplementary material for: Metabolite Profiling, Biological and Molecular Analyses Validate the Nutraceutical Potential of Green Seaweed Acrosiphonia orientalis for Human Health
Source: Nutrients. 2024 Apr 19;16(8):1222. doi: 10.3390/nu16081222 (PMC11055090; doi:10.3390/nu16081222)
Supplement: Supplementary file 1 [file nutrients-16-01222-s001.zip › Table S6.xlsx]

## Sheet: Pathway results_HPLC
Table S6: Pathway analysis results of log transformed and range scaled metabolite abundance by HPLC in A. orientalis
	Total	Expected	Hits	Raw p	Holm adjust	FDR	Impact
Flavonoid biosynthesis	47	0.47539	5	6.11e-05	0.0058617	0.004629	0.10671
Flavone and flavonol biosynthesis	10	0.10115	3	9.64e-05	0.0091616	0.004629	0.35
Biosynthesis of secondary metabolites - unclassified	5	0.050573	1	0.049626	1	1	1
Phenylpropanoid biosynthesis	46	0.46527	2	0.076498	1	1	0.05295
Ascorbate and aldarate metabolism	18	0.18206	1	0.16811	1	1	0
Ubiquinone and other terpenoid-quinone biosynthesis	38	0.38436	1	0.32378	1	1	0.00097
