# Supplementary material for: Metabolite Profiling, Biological and Molecular Analyses Validate the Nutraceutical Potential of Green Seaweed Acrosiphonia orientalis for Human Health
Source: Nutrients. 2024 Apr 19;16(8):1222. doi: 10.3390/nu16081222 (PMC11055090; doi:10.3390/nu16081222)
Supplement: Supplementary file 1 [file nutrients-16-01222-s001.zip › Table S7.xlsx]

## Sheet: Dif exp gene detailed
Table S7: Differentially expressed genes in Huh-7 cells analyzed by microarray using HTA2.0 gene chip
ID	Fold Change	Chromosome	Strand	Group	mRNA Description
TCUn_gl000223000003.hg.1	4.11	chrUn_gl000223	-	Coding	piRNA npiR-52777
TC02000729.hg.1	4.11	chr2	+	Coding	piRNA piR-36545 class lncRNA
TC10000551.hg.1	3.36	chr10	+	Coding	piRNA piR-51788
TC15000520.hg.1	3.2	chr15	+	Coding	piRNA piR-34184 class lncRNA
TC11001638.hg.1	3.18	chr11	-	Coding	piRNA piR-60247
TC01001140.hg.1	3.15	chr1	+	Coding	transfer RNA Asn (anticodon GTT)
TC06001451.hg.1	3.14	chr6	-	Coding	transfer RNA Ala (anticodon AGC)
TC14000919.hg.1	3.11	chr14	-	Coding	Small nucleolar RNA, C/D box 8 (SNORD8), class lncRNAcnci=-0.4724392
TC12000055.hg.1	3.04	chr12	+	Coding	piRNA piR-34158 class lncRNA
TC16000486.hg.1	3	chr16	+	Coding	transfer RNA Leu (anticodon CAG)
TC16001138.hg.1	3	chr16	-	Coding	transfer RNA Leu (anticodon CAG)
TC01001389.hg.1	3	chr1	+	Coding	transfer RNA Leu (anticodon CAG)
TC01001391.hg.1	3	chr1	+	Coding	transfer RNA Leu (anticodon CAG)
TC01001393.hg.1	3	chr1	+	Coding	transfer RNA Leu (anticodon CAG)
TC01001395.hg.1	3	chr1	+	Coding	transfer RNA Leu (anticodon CAG)
TC01001397.hg.1	3	chr1	+	Coding	transfer RNA Leu (anticodon CAG)
TC01003444.hg.1	3	chr1	-	Coding	transfer RNA Leu (anticodon CAG)
TC06000191.hg.1	3	chr6	+	Coding	transfer RNA Leu (anticodon CAG)
TC09000426.hg.1	2.98	chr9	+	Coding	piRNA piR-52113, class lncRNA
TC06001390.hg.1	2.91	chr6	-	Coding	transfer RNA Val (anticodon CAC)
TC06001395.hg.1	2.84	chr6	-	Coding	transfer RNA Val (anticodon CAC)
TC01003167.hg.1	2.84	chr1	-	Coding	transfer RNA Val (anticodon CAC)
TC01003426.hg.1	2.84	chr1	-	Coding	transfer RNA Val (anticodon CAC)
TC05001072.hg.1	2.84	chr5	+	Coding	transfer RNA Val (anticodon CAC)
TC05001077.hg.1	2.84	chr5	+	Coding	transfer RNA Val (anticodon CAC)
TC05002155.hg.1	2.84	chr5	-	Coding	transfer RNA Val (anticodon CAC)
TC05002166.hg.1	2.84	chr5	-	Coding	transfer RNA Val (anticodon CAC)
TC06000194.hg.1	2.84	chr6	+	Coding	transfer RNA Val (anticodon CAC)
TC02001958.hg.1	2.83	chr2	-	Coding	transfer RNA Gly (anticodon CCC)
TC16000732.hg.1	2.83	chr16	-	Coding	transfer RNA Gly (anticodon CCC)
TC01003183.hg.1	2.83	chr1	-	Coding	transfer RNA Val (anticodon CAC)
TC01001134.hg.1	2.8	chr1	+	Coding	transfer RNA pseudogene (anticodon CTG)
TC11001822.hg.1	2.75	chr11	-	Coding	transfer RNA Val (anticodon TAC)
TC10001389.hg.1	2.73	chr10	-	Coding	THERAPEUTIC USES OF INHIBITORS OF RTP801.
TC06000196.hg.1	2.7	chr6	+	Coding	transfer RNA Ala (anticodon CGC)
TC01001143.hg.1	2.7	chr1	+	Coding	transfer RNA Asn (anticodon GTT)
TC01003428.hg.1	2.7	chr1	-	Coding	transfer RNA Asn (anticodon GTT)
TC10001099.hg.1	2.7	chr10	-	Coding	transfer RNA Asn (anticodon GTT)
TC13000535.hg.1	2.7	chr13	-	Coding	transfer RNA Asn (anticodon GTT)
TC17001431.hg.1	2.7	chr17	-	Coding	transfer RNA Asn (anticodon GTT)
TC08001295.hg.1	2.67	chr8	-	Coding	piRNA piR-51811, class lncRNA
TC01000157.hg.1	2.66	chr1	+	Coding	Small nucleolar RNA, H/ACA box 59B (SNORA59B) class lncRNA
TC17000242.hg.1	2.66	chr17	+	Coding	Small nucleolar RNA, H/ACA box 59B (SNORA59B), class=lncRNA
TC04002588.hg.1	2.63	chr4	-	NonCoding	mRNAlike lncRNA
TC06001452.hg.1	2.63	chr6	-	Coding	transfer RNA Ala (anticodon CGC)
TC06000123.hg.1	2.63	chr6	+	Coding	transfer RNA Gln (anticodon CTG)
TC06000248.hg.1	2.63	chr6	+	Coding	transfer RNA Gln (anticodon CTG)
TC06001475.hg.1	2.63	chr6	-	Coding	transfer RNA Gln (anticodon CTG)
TC15001574.hg.1	2.63	chr15	-	Coding	transfer RNA Gln (anticodon CTG)
TC17000129.hg.1	2.63	chr17	+	Coding	transfer RNA Gln (anticodon CTG)
TC0X000897.hg.1	2.62	chrX	-	Coding	transfer RNA Val (anticodon TAC)
TC11001821.hg.1	2.62	chr11	-	Coding	transfer RNA Val (anticodon TAC)
TC12001420.hg.1	2.61	chr12	-	Coding	Y RNA, Ro-associated Y5 (RNY5), class lncRNA
TC16001253.hg.1	2.56	chr16	-	Coding	Small nucleolar RNA, C/D box 71 (SNORD71), class lncRNA
TC17000102.hg.1	2.54	chr17	+	Coding	Small nucleolar RNA, C/D box 10 (SNORD10), class lncRNA
TC06000232.hg.1	2.51	chr6	+	Coding	transfer RNA Val (anticodon AAC)
TC01001404.hg.1	2.5	chr1	+	Coding	transfer RNA Asn (anticodon GTT)
TC19001069.hg.1	2.44	chr19	-	Coding	transfer RNA Val (anticodon CAC)
TC19000291.hg.1	2.41	chr19	+	Coding	piRNA piR-52806, class lncRNA
TC11002391.hg.1	2.41	chr11	-	Coding	Small nucleolar RNA, C/D box 14E
TC10001334.hg.1	2.4	chr10	-	Coding	Annexin II and uses thereof.
TC05002649.hg.1	2.38	chr5	+	NonCoding	lncRNA
TC06000759.hg.1	2.34	chr6	+	Coding	Y RNA, Ro-associated Y4 (RNY4), class lncRNA
TC16000199.hg.1	2.33	chr16	+	Coding	piRNA piR-54031
TC16000185.hg.1	2.33	chr16	+	Coding	piRNA piR-54031
TC08002370.hg.1	2.32	chr8	-	NonCoding	mRNAlike lncRNA
TC06001419.hg.1	2.32	chr6	-	Coding	transfer RNA Gln (anticodon CTG)
TC01003151.hg.1	2.3	chr1	-	Coding	transfer RNA Asn (anticodon GTT)
TC01003153.hg.1	2.3	chr1	-	Coding	transfer RNA Asn (anticodon GTT)
TC05001301.hg.1	2.29	chr5	-	Coding	Small nucleolar RNA, C/D box 72 (SNORD72), small nucleolar RNA. class lncRNA
TC01002275.hg.1	2.29	chr1	-	Coding	transfer RNA Gly (anticodon CCC)
TC07002240.hg.1	2.28	chr7	+	NonCoding	linc-AVL9 chr7
TC15001896.hg.1	2.28	chr15	-	Coding	piRNA piR-59700 class lncRNA
TC03000905.hg.1	2.28	chr3	+	Coding	transfer RNA Val (anticodon AAC)
TC05001075.hg.1	2.28	chr5	+	Coding	transfer RNA Val (anticodon AAC)
TC05001076.hg.1	2.28	chr5	+	Coding	transfer RNA Val (anticodon AAC)
TC05002164.hg.1	2.28	chr5	-	Coding	transfer RNA Val (anticodon AAC)
TC06001418.hg.1	2.28	chr6	-	Coding	transfer RNA Val (anticodon AAC)
TC18000225.hg.1	2.26	chr18	+	Coding	cdna:novel chromosome:GRCh37
TC06001364.hg.1	2.25	chr6	-	Coding	snRNA
TC05002973.hg.1	2.21	chr5	-	NonCoding	mRNAlike lncRNA
TC22000762.hg.1	2.21	chr22	-	Coding	piRNA piR-39871
TC07001352.hg.1	2.21	chr7	-	Coding	Small nucleolar RNA, H/ACA box 5A (SNORA5A), small nucleolar RNA class=lncRNA
TC06001356.hg.1	2.21	chr6	-	Coding	transfer RNA Ser (anticodon GCT)
TC01000220.hg.1	2.2	chr1	+	Coding	transfer RNA pseudogene (anticodon CAC)
TC01002270.hg.1	2.2	chr1	-	Coding	transfer RNA pseudogene (anticodon CAC)
TC06000222.hg.1	2.18	chr6	+	Coding	transfer RNA Ser (anticodon GCT)
TC10001003.hg.1	2.17	chr10	-	Coding	transfer RNA Val (anticodon TAC)
TC18000313.hg.1	2.12	chr18	-	Coding	contig region AP005227.3/65987-65957
TC19002270.hg.1	2.12	chr19	+	NonCoding	mRNAlike lncRNA
TC08002271.hg.1	2.12	chr8	-	NonCoding	mRNAlike lncRNA
TC22000587.hg.1	2.12	chr22	-	Coding	piRNA piR-44965, class lncRNA
TC08001459.hg.1	2.12	chr8	-	Coding	Small nucleolar RNA, H/ACA box 72 (SNORA72), small nucleolar RNA. class=lncRNA cpcScore=-1.2098400 cnci=-0.4121050
TC06000183.hg.1	2.12	chr6	+	Coding	transfer RNA Arg (anticodon ACG)
TC06000193.hg.1	2.12	chr6	+	Coding	transfer RNA Arg (anticodon ACG)
TC06001404.hg.1	2.12	chr6	-	Coding	transfer RNA Gln (anticodon CTG)
TC15002609.hg.1	2.1	chr15	-	NonCoding	mRNAlike lncRNA
TC06000231.hg.1	2.1	chr6	+	Coding	transfer RNA Arg (anticodon ACG)
TC06001391.hg.1	2.1	chr6	-	Coding	transfer RNA Arg (anticodon ACG)
TC06001412.hg.1	2.1	chr6	-	Coding	transfer RNA Arg (anticodon ACG)
TC01003163.hg.1	2.1	chr1	-	Coding	transfer RNA Asn (anticodon GTT)
TC18000761.hg.1	2.09	chr18	+	NonCoding	mRNAlike lncRNA
TC22001202.hg.1	2.09	chr22	-	NonCoding	mRNAlike lncRNA
TC11002831.hg.1	2.08	chr11	+	NonCoding	mRNAlike lncRNA
TC11002283.hg.1	2.08	chr11	-	Coding	piRNA piR-37393
TC04001578.hg.1	2.08	chr4	-	Coding	protein phosphatase 1, regulatory (inhibitor) subunit 14B pseudogene 3
TC19001622.hg.1	2.08	chr19	-	Coding	transfer RNA SeC (anticodon TCA)
TC22000851.hg.1	2.07	chr22	-	Coding	ATP synthase, H+ transporting, mitochondrial Fo complex, subunit G2 (ATP5L2), mRNA.
TC22001368.hg.1	2.07	chr22	-	NonCoding	lncRNA
TC09001570.hg.1	2.07	chr9	-	Coding	piRNA piR-32421, class lncRNA
TC06000294.hg.1	2.06	chr6	+	Coding	transfer RNA Ala (anticodon CGC)
TC01006113.hg.1	2.05	chr1	-	NonCoding	mRNAlike lncRNA
TC06001414.hg.1	2.05	chr6	-	Coding	transfer RNA Val (anticodon AAC)
TC11002577.hg.1	2.04	chr11	+	NonCoding	lncRNA
TC13001583.hg.1	2.04	chr13	-	NonCoding	putative novel transcript
TC06000290.hg.1	2.04	chr6	+	Coding	transfer RNA Ala (anticodon TGC)
TC08000092.hg.1	2.03	chr8	+	Coding	pseudogene
TC11001453.hg.1	2.03	chr11	-	Coding	snoRNA
TC0X002099.hg.1	2.02	chrX	-	NonCoding	linc-LAS1L chrX
TC15001945.hg.1	2.02	chr15	-	Coding	piRNA piR-51779, class lncRNA
TC11000172.hg.1	2.02	chr11	+	Coding	Small nucleolar RNA, H/ACA box 23 (SNORA23), small nucleolar RNA.class lncRNA
TC06001461.hg.1	2.02	chr6	-	Coding	transfer RNA Ala (anticodon TGC)
TC06001357.hg.1	2.02	chr6	-	Coding	transfer RNA Gln (anticodon TTG)
TC06001358.hg.1	2.02	chr6	-	Coding	transfer RNA Gln (anticodon TTG)
TC06001420.hg.1	2.02	chr6	-	Coding	transfer RNA Gln (anticodon TTG)
TC17000639.hg.1	2.02	chr17	+	Coding	transfer RNA Gln (anticodon TTG)
TC06001447.hg.1	2.02	chr6	-	Coding	transfer RNA Ser (anticodon GCT)
TC15001239.hg.1	2.02	chr15	-	Coding	transfer RNA Ser (anticodon GCT)
TC06000239.hg.1	2.02	chr6	+	Coding	transfer RNA Ser (anticodon GCT)
TC15000168.hg.1	2.01	chr15	+	Coding	piRNA piR-34385
TC15000211.hg.1	2.01	chr15	+	Coding	piRNA piR-34385
TC15001125.hg.1	2.01	chr15	-	Coding	piRNA piR-56361
TC15001152.hg.1	2.01	chr15	-	Coding	piRNA piR-56361
TC07000478.hg.1	2.01	chr7	+	Coding	Small nucleolar RNA, H/ACA box 14A (SNORA14A), small nucleolar RNA. class lncRNA
TC01001126.hg.1	2.01	chr1	+	Coding	transfer RNA Asn (anticodon ATT)
TC1_gl000192_random000001.hg.1	2.01	chr1_gl000192_random	+	Coding	transfer RNA Asn (anticodon ATT)
TC02001189.hg.1	2	chr2	+	Coding	Small nucleolar RNA, C/D box 70 (SNORD70), small nucleolar RNA
TC02002667.hg.1	2	chr2	-	Coding	Y RNA
TC02002360.hg.1	-2	chr2	-	Coding	Homo sapiens microRNA 663b (MIR663B), microRNA.; microRNA 663b
TC08002398.hg.1	-2	chr8	-	NonCoding	mRNAlike lncRNA
TC01001826.hg.1	-2	chr1	+	Coding	ncrna:novel chromosome
TC16000276.hg.1	-2	chr16	+	Coding	piRNA piR-50952
TC02000907.hg.1	-2	chr2	+	Coding	Y RNA
TC05000876.hg.1	-2.02	chr5	+	Coding	havana:known chromosome:GRCh38; novel transcript
TC15002240.hg.1	-2.02	chr15	+	NonCoding	lncRNA
TC09002549.hg.1	-2.02	chr9	-	NonCoding	mRNAlike lncRNA
TC22000010.hg.1	-2.02	chr22	+	Coding	ncrna:miRNA chromosome miRNA transcript
TC19000423.hg.1	-2.02	chr19	+	Coding	ncrna:novel chromosome miRNA transcript
TC16001289.hg.1	-2.02	chr16	-	Coding	ncrna:novel chromosome: miRNA transcript
TC06001626.hg.1	-2.02	chr6	-	Coding	piRNA piR-47766
TC06002094.hg.1	-2.03	chr6	-	Coding	havana:known chromosome:sense_intronic transcript_biotype
TC14002228.hg.1	-2.03	chr14	-	Coding	immunoglobulin heavy diversity 3-16
TC09002394.hg.1	-2.03	chr9	-	NonCoding	lincRNA
TC11002200.hg.1	-2.03	chr11	-	Coding	microRNA 548l
TC01002920.hg.1	-2.03	chr1	-	Coding	ncrna:novel chromosome: miRNA transcript
TC03001045.hg.1	-2.03	chr3	+	Coding	ncrna:novel chromosome:miRNA transcript
TC11001158.hg.1	-2.03	chr11	+	Coding	RNA, U6 small nuclear 1156, pseudogene
TC04001118.hg.1	-2.04	chr4	-	Coding	contig region
TC10001044.hg.1	-2.04	chr10	-	Coding	microRNA 548q
TC02003075.hg.1	-2.04	chr2	+	NonCoding	putative novel transcript
TC07000690.hg.1	-2.05	chr7	+	Coding	ncrna:novel chromosome:miRNA transcript
TC09000096.hg.1	-2.05	chr9	+	Coding	ncrna:novel chromosome:miRNA transcript
TC05001792.hg.1	-2.05	chr5	-	Coding	ncrna:snRNA chromosome:snRNA transcript
TC02003954.hg.1	-2.05	chr2	-	NonCoding	novel transcript
TC19001435.hg.1	-2.05	chr19	-	Coding	piRNA piR-32994
TC07001380.hg.1	-2.05	chr7	-	Coding	piRNA piR-35958
TC07001422.hg.1	-2.05	chr7	-	Coding	piRNA piR-35958
TC19001314.hg.1	-2.05	chr19	-	Coding	piRNA piR-41721
TC14001396.hg.1	-2.05	chr14	-	Coding	piRNA piR-44697
TC01001879.hg.1	-2.05	chr1	+	Coding	piRNA piR-52050
TC07000289.hg.1	-2.05	chr7	+	Coding	piRNA piR-52051
TC07000367.hg.1	-2.05	chr7	+	Coding	piRNA piR-52051
TC03001062.hg.1	-2.06	chr3	+	Coding	ncrna:novel chromosome:miRNA transcript
TC03000439.hg.1	-2.06	chr3	+	Coding	ncrna:novel chromosome:miRNA transcript
TC11000701.hg.1	-2.06	chr11	+	Coding	ncrna:novel chromosome:miRNA transcript
TC19000163.hg.1	-2.07	chr19	+	Coding	ncrna:novel chromosome::miRNA transcript
TC06000463.hg.1	-2.07	chr6	+	Coding	piRNA piR-34620
TC06002367.hg.1	-2.08	chr6	+	NonCoding	mRNAlike lncRNA
TC05002034.hg.1	-2.09	chr5	-	Coding	ncrna:novel chromosome:miRNA transcript
TC15000994.hg.1	-2.09	chr15	+	Coding	piRNA piR-31438
TC14001416.hg.1	-2.09	chr14	-	Coding	piRNA piR-40171
TC15001395.hg.1	-2.09	chr15	-	Coding	piRNA piR-45309
TC15000480.hg.1	-2.09	chr15	+	Coding	piRNA piR-47311
TC02004450.hg.1	-2.09	chr2	-	NonCoding	putative novel transcript, lincRNA transcript
TC09000757.hg.1	-2.09	chr9	+	Coding	U5D small nuclear 2, pseudogene
TC22000425.hg.1	-2.1	chr22	+	Coding	has-miR-mizuguchi-155
TC12001788.hg.1	-2.1	chr12	-	Coding	microRNA 548al (MIR548AL), microRNA
TC14001730.hg.1	-2.1	chr14	+	NonCoding	mRNAlike lncRNA
TC04001524.hg.1	-2.1	chr4	-	Coding	ncrna:novel chromosome:miRNA transcript
TC05002696.hg.1	-2.11	chr5	+	NonCoding	lncRNA
TC05002461.hg.1	-2.11	chr5	+	NonCoding	lncRNA name
TC11001660.hg.1	-2.11	chr11	-	Coding	piRNA piR-37278
TC15000906.hg.1	-2.11	chr15	+	Coding	piRNA piR-58893
TC04001310.hg.1	-2.12	chr4	-	Coding	Contig region AC034139.7/110732-110689
TC05000688.hg.1	-2.12	chr5	+	Coding	novel chromosome:miRNA transcript
TC16000248.hg.1	-2.12	chr16	+	Coding	piRNA piR-51228
TC05001641.hg.1	-2.12	chr5	-	Coding	Solute carrier organic anion transporter family, member 4C1 (SLCO4C1)
TC10001432.hg.1	-2.13	chr10	-	Coding	novel chromosome:miRNA transcript
TC04001716.hg.1	-2.13	chr4	-	Coding	novel chromosome:miRNA transcript
TC06000442.hg.1	-2.13	chr6	+	Coding	piRNA piR-40750
TC01004129.hg.1	-2.14	chr1	+	NonCoding	lncRNA
TC11002041.hg.1	-2.14	chr11	-	Coding	novel chromosome:miRNA transcript
TC18000381.hg.1	-2.14	chr18	-	Coding	novel chromosome:miRNA transcript
TC09001231.hg.1	-2.14	chr9	-	Coding	piRNA piR-50990
TC09001709.hg.1	-2.15	chr9	-	Coding	microRNA 3689f (MIR3689F)
TC17000412.hg.1	-2.15	chr17	+	Coding	piRNA piR-33300
TC17000419.hg.1	-2.15	chr17	+	Coding	piRNA piR-33300
TC17000426.hg.1	-2.15	chr17	+	Coding	piRNA piR-33300
TC07000291.hg.1	-2.15	chr7	+	Coding	piRNA piR-41964
TC07001378.hg.1	-2.15	chr7	-	Coding	piRNA piR-52083
TC07001399.hg.1	-2.15	chr7	-	Coding	piRNA piR-52083
TC07001410.hg.1	-2.15	chr7	-	Coding	piRNA piR-52083
TC06000445.hg.1	-2.15	chr6	+	Coding	piRNA piR-59973
TC11000565.hg.1	-2.15	chr11	+	Coding	Transmembrane protein 179B (TMEM179B)
TC11000080.hg.1	-2.16	chr11	+	Coding	novel chromosome:miRNA transcript
TC01003860.hg.1	-2.16	chr1	-	Coding	piRNA piR-35958
TC14001409.hg.1	-2.17	chr14	-	Coding	piRNA piR-40196
TC07003086.hg.1	-2.19	chr7	-	NonCoding	lincRNA name
TC10000916.hg.1	-2.19	chr10	+	Coding	novel chromosome:miRNA transcript
TC03002122.hg.1	-2.19	chr3	-	Coding	OPA1 antisense RNA 1; novel transcript
TC11001710.hg.1	-2.19	chr11	-	Coding	piRNA piR-45546
TC06002130.hg.1	-2.2	chr6	-	Coding	piRNA piR-58560
TC09001898.hg.1	-2.21	chr9	+	NonCoding	lncRNA
TC14001212.hg.1	-2.21	chr14	-	Coding	microRNA 548h-1
TC08000527.hg.1	-2.21	chr8	+	Coding	novel chromosome:miRNA transcript
TC14001405.hg.1	-2.21	chr14	-	Coding	piRNA piR-43454
TC08000302.hg.1	-2.22	chr8	+	Coding	novel chromosome:miRNA transcript
TC14001414.hg.1	-2.22	chr14	-	Coding	piRNA piR-42049
TC03001553.hg.1	-2.23	chr3	-	Coding	novel chromosome:miRNA transcript
TC17001606.hg.1	-2.23	chr17	-	Coding	piRNA piR-34014
TC02000818.hg.1	-2.23	chr2	+	Coding	piRNA piR-38859
TC02000832.hg.1	-2.23	chr2	+	Coding	piRNA piR-38859
TC15000034.hg.1	-2.23	chr15	+	Coding	piRNA piR-46014
TC15000133.hg.1	-2.23	chr15	+	Coding	piRNA piR-46014
TC15001045.hg.1	-2.23	chr15	-	Coding	piRNA piR-46014
TC02002338.hg.1	-2.23	chr2	-	Coding	piRNA piR-56460
TC15000546.hg.1	-2.23	chr15	+	Coding	piRNA piR-58715
TC15000009.hg.1	-2.23	chr15	+	Coding	piRNA piR-61760
TC15000038.hg.1	-2.23	chr15	+	Coding	piRNA piR-61760
TC01003232.hg.1	-2.23	chr1	-	Coding	U6 small nuclear 662, pseudogene
TC04001473.hg.1	-2.24	chr4	-	Coding	microRNA 297
TC03001727.hg.1	-2.24	chr3	-	Coding	microRNA 548i-1 (MIR548I1)
TC08000934.hg.1	-2.24	chr8	-	Coding	microRNA 548i-3 (MIR548I3)
TC02000205.hg.1	-2.24	chr2	+	Coding	novel chromosome:miRNA transcript
TC0X001435.hg.1	-2.25	chrX	-	Coding	Cerebellar degeneration-related protein 1, 34kDa (CDR1)
TC07000657.hg.1	-2.25	chr7	+	Coding	lincRNA transcript
TC09002209.hg.1	-2.25	chr9	+	NonCoding	mRNAlike lncRNA
TC12000927.hg.1	-2.25	chr12	+	Coding	novel chromosome:miRNA transcript
TC01003308.hg.1	-2.25	chr1	-	Coding	novel chromosome:miRNA transcript
TC11001688.hg.1	-2.26	chr11	-	Coding	piRNA piR-35766
TC01005191.hg.1	-2.27	chr1	-	NonCoding	lincRNA
TC04002624.hg.1	-2.29	chr4	-	NonCoding	mRNAlike lncRNA
TC15001890.hg.1	-2.29	chr15	-	Coding	novel chromosome:miRNA transcript
TC11000220.hg.1	-2.3	chr11	+	Coding	antisense transcript
TC20000679.hg.1	-2.3	chr20	-	Coding	piRNA piR-41775
TC22000424.hg.1	-2.3	chr22	+	Coding	Y RNA
TC02002994.hg.1	-2.31	chr2	+	NonCoding	lincRNA
TC07002493.hg.1	-2.31	chr7	+	NonCoding	mRNAlike lncRNA
TC15001099.hg.1	-2.31	chr15	-	Coding	piRNA piR-38202
TC15001403.hg.1	-2.31	chr15	-	Coding	piRNA piR-45588
TC03000687.hg.1	-2.31	chr3	+	Coding	snoRNA transcript
TC10002694.hg.1	-2.32	chr10	-	NonCoding	mRNAlike lncRNA
TC0X002258.hg.1	-2.33	chrX	-	NonCoding	lncRNA
TC03002425.hg.1	-2.33	chr3	+	NonCoding	lncRNA name
TC06001136.hg.1	-2.33	chr6	+	Coding	novel chromosome:
TC08000106.hg.1	-2.34	chr8	+	Coding	novel chromosome:miRNA transcript
TC04001635.hg.1	-2.34	chr4	-	Coding	novel chromosome; miRNA transcript
TC02003914.hg.1	-2.36	chr2	+	NonCoding	lncRNA
TC12001449.hg.1	-2.36	chr12	-	Coding	miRNA chromosome:miRNA transcript
TC02001429.hg.1	-2.36	chr2	+	Coding	novel chromosome:miRNA transcript
TC05001236.hg.1	-2.38	chr5	-	Coding	microRNA 579
TC01003856.hg.1	-2.38	chr1	-	Coding	piRNA piR-44522
TC01004035.hg.1	-2.38	chr1	-	Coding	piRNA piR-44522
TC12003194.hg.1	-2.39	chr12	-	NonCoding	lncRNA
TC05001347.hg.1	-2.4	chr5	-	Coding	microRNA 581 (MIR581)
TC01005915.hg.1	-2.4	chr1	-	NonCoding	novel transcript
TC12000052.hg.1	-2.42	chr12	+	Coding	piRNA piR-56285
TC0M000016.hg.1	-2.43	chrM	-	Coding	piRNA piR-34804
TC01002798.hg.1	-2.44	chr1	-	Coding	novel chromosome:miRNA transcript
TC15000672.hg.1	-2.44	chr15	+	Coding	piRNA piR-55000
TC19001322.hg.1	-2.45	chr19	-	Coding	piRNA piR-50871
TC15001425.hg.1	-2.47	chr15	-	Coding	piRNA piR-45492
TC09001648.hg.1	-2.49	chr9	-	Coding	novel chromosome:miRNA transcript
TC12000470.hg.1	-2.5	chr12	+	Coding	piRNA piR-41775
TC0X000450.hg.1	-2.51	chrX	+	Coding	novel chromosome:miRNA transcript
TC05001126.hg.1	-2.51	chr5	-	Coding	putative novel transcript
TC09000409.hg.1	-2.53	chr9	+	Coding	piRNA piR-46143
TC09001303.hg.1	-2.53	chr9	-	Coding	piRNA piR-46143
TC06002303.hg.1	-2.54	chr6	-	Coding	novel chromosome:miRNA transcript
TC02001302.hg.1	-2.56	chr2	+	Coding	microRNA 26b (MIR26B)
TC03001571.hg.1	-2.56	chr3	-	Coding	novel chromosome:miRNA transcript
TC17001773.hg.1	-2.56	chr17	-	Coding	novel chromosome:miRNA transcript
TC15000239.hg.1	-2.56	chr15	+	Coding	piRNA piR-30576
TC17001050.hg.1	-2.56	chr17	-	Coding	piRNA piR-42914
TC17001417.hg.1	-2.56	chr17	-	Coding	piRNA piR-42914
TC17000410.hg.1	-2.56	chr17	+	Coding	piRNA piR-42916
TC17000431.hg.1	-2.56	chr17	+	Coding	piRNA piR-42916
TC17000749.hg.1	-2.56	chr17	+	Coding	piRNA piR-42916
TC17000418.hg.1	-2.56	chr17	+	Coding	piRNA piR-42917
TC17000425.hg.1	-2.56	chr17	+	Coding	piRNA piR-42917
TC17000454.hg.1	-2.56	chr17	+	Coding	piRNA piR-42917
TC17000732.hg.1	-2.56	chr17	+	Coding	piRNA piR-42917
TC16000401.hg.1	-2.57	chr16	+	Coding	novel chromosome:miRNA transcript
TC16002013.hg.1	-2.59	chr16	-	NonCoding	lncRNA name
TC01000013.hg.1	-2.59	chr1	+	Coding	Mitochondrial Lys-tRNA-aaa
TC09000586.hg.1	-2.6	chr9	+	Coding	novel chromosome:miRNA transcript
TC15000452.hg.1	-2.6	chr15	+	Coding	novel chromosome:miRNA transcript
TC15001432.hg.1	-2.6	chr15	-	Coding	piRNA piR-43114
TC11001648.hg.1	-2.61	chr11	-	Coding	piRNA piR-55146
TC14001415.hg.1	-2.62	chr14	-	Coding	piRNA piR-50526
TC06001266.hg.1	-2.62	chr6	-	Coding	Y RNA
TC05001001.hg.1	-2.63	chr5	+	Coding	novel chromosome:miRNA transcript
TC15001418.hg.1	-2.63	chr15	-	Coding	piRNA piR-37363
TC06000568.hg.1	-2.64	chr6	+	Coding	miRNA chromosome:miRNA transcript
TC15001604.hg.1	-2.64	chr15	-	Coding	novel chromosome:miRNA transcript
TC14001412.hg.1	-2.64	chr14	-	Coding	piRNA piR-58289
TC08001540.hg.1	-2.65	chr8	-	Coding	novel chromosome:miRNA transcript
TC0M000017.hg.1	-2.67	chrM	-	Coding	piRNA piR-31490
TC15001387.hg.1	-2.67	chr15	-	Coding	piRNA piR-35024
TC07002494.hg.1	-2.68	chr7	+	NonCoding	mRNAlike lncRNA
TC09000971.hg.1	-2.68	chr9	-	Coding	novel chromosome:miRNA transcript
TC12002688.hg.1	-2.71	chr12	+	NonCoding	lncRNA
TC11001601.hg.1	-2.73	chr11	-	Coding	piRNA piR-51047
TC07002052.hg.1	-2.78	chr7	-	Coding	miRNA chromosome:miRNA transcript
TC05001562.hg.1	-2.78	chr5	-	Coding	novel chromosome:miRNA transcript
TC12001111.hg.1	-2.79	chr12	-	Coding	piRNA piR-35593
TC07002266.hg.1	-2.79	chr7	+	NonCoding	scaRNA
TC15001423.hg.1	-2.81	chr15	-	Coding	piRNA piR-37343
TC06001041.hg.1	-2.82	chr6	+	Coding	Novel nucleic acids
TC12000633.hg.1	-2.83	chr12	+	Coding	miRNA chromosome:miRNA transcript
TC14001401.hg.1	-2.83	chr14	-	Coding	piRNA piR-35338
TC12000051.hg.1	-2.88	chr12	+	Coding	piRNA piR-38068
TC09001146.hg.1	-2.89	chr9	-	Coding	piRNA piR-38853
TC09001119.hg.1	-2.89	chr9	-	Coding	piRNA piR-38854
TC15000987.hg.1	-2.93	chr15	+	Coding	piRNA piR-30562
TC06002176.hg.1	-2.94	chr6	-	Coding	Novel nucleic acids
TC15001379.hg.1	-2.94	chr15	-	Coding	piRNA piR-56645
TC05000673.hg.1	-2.96	chr5	+	Coding	microRNA 4461 (MIR4461)
TC18000344.hg.1	-2.98	chr18	-	Coding	piRNA piR-44897
TC02002572.hg.1	-3.12	chr2	-	Coding	Contig region
TC20000650.hg.1	-3.12	chr20	-	Coding	novel chromosome:miRNA transcript
TC21000562.hg.1	-3.26	chr21	+	NonCoding	lincRNA
TC11001652.hg.1	-3.26	chr11	-	Coding	piRNA piR-46348
TC13000215.hg.1	-3.34	chr13	+	Coding	microRNA 4703 (MIR4703)
TC06001612.hg.1	-3.38	chr6	-	Coding	piRNA piR-45294
TC13000783.hg.1	-3.44	chr13	-	Coding	novel chromosome:miRNA transcript
TC09001352.hg.1	-3.5	chr9	-	Coding	METHODS AND COMPOSITIONS FOR REDUCING VIRAL GENOME AMOUNTS IN A TARGET CELL.
TC14002240.hg.1	-4.03	chr14	-	Coding	immunoglobulin heavy diversity 3-3
TC21000007.hg.1	-7.57	chr21	+	Coding	microRNA 3687-1 (MIR3687-1)
TC04000276.hg.1	-157.56	chr4	+	Coding	novel chromosome:miRNA transcript
